# Supplementary material for: Identification and pathogenomic analysis of an Escherichia coli strain producing a novel Shiga toxin 2 subtype
Source: PubMed Central journal article supplement (PMC5928088; doi:10.1038/s41598-018-25233-x), 2018-04-30
Supplement: 41598_2018_25233_MOESM1_ESM.pdf [file 41598_2018_25233_MOESM1_ESM.pdf]

## Supplementary Information

### Identification and Pathogenomic Analysis of an *Escherichia coli* Strain Producing a Novel Shiga Toxin 2 Subtype

Running title: A novel Subtype of Shiga Toxin 2

Xiangning Bai<sup>1†</sup>, Shanshan Fu<sup>1†</sup>, Ji Zhang<sup>2†</sup>, Ruyue Fan<sup>1</sup>, Yanmei Xu<sup>1</sup>, Hui Sun<sup>1</sup>, Xiaohua He<sup>3</sup>, Jianguo Xu<sup>1,4</sup>, and Yanwen Xiong<sup>1,4\*</sup>

1. State Key Laboratory of Infectious Disease Prevention and Control, National Institute for Communicable Disease Control and Prevention, Chinese Center for Disease Control and Prevention, Changping, Beijing, China;
2. mEpiLab, Institute of Veterinary, Animal and Biomedical Sciences, Massey University, New Zealand;
3. Western Regional Research Center, U.S. Department of Agriculture, Agricultural Research Service, Albany, California, USA;
4. Collaborative Innovation Center for Diagnosis and Treatment of Infectious Diseases, Hangzhou, Zhejiang Province, China

† These authors contributed equally to this work.

\* Corresponding author. Tel.: +8610 58900749; Fax: +8610 58900748

E-mail address: xiongyanwen@icdc.cn

**Table S1. *E. coli*/*Shigella* genomes used in whole genome analysis.**

| <b>Isolate</b>               | <b>Pathovar</b>   | <b>Accession number</b> |
|------------------------------|-------------------|-------------------------|
| EDL933                       | STEC <sup>a</sup> | NZ_CP008957.1           |
| Sakai                        | STEC <sup>a</sup> | NC_002695.1             |
| Xuzhou21                     | STEC <sup>a</sup> | NC_017906.1             |
| EC4115                       | STEC <sup>a</sup> | NC_011353               |
| TW14359                      | STEC <sup>a</sup> | NC_013008               |
| 2011C-3493                   | STEC <sup>b</sup> | NC_018658.1             |
| 12009                        | STEC <sup>c</sup> | NC_013353.1             |
| 11368                        | STEC <sup>d</sup> | NC_013361.1             |
| RM13514                      | STEC <sup>e</sup> | CP006027.1              |
| 11128                        | STEC <sup>f</sup> | NC_013364.1             |
| NRG 857C                     | AIEC              | NC_017634               |
| UM146                        | AIEC              | NC_017632               |
| 042                          | EAEC              | NC_017626               |
| 55989                        | EAEC              | CU928145                |
| CB9615                       | EPEC              | NC_013941               |
| E2348/69                     | EPEC              | NC_011601               |
| UMNK88                       | ETEC              | NC_017641               |
| E24377A                      | ETEC              | NC_009801               |
| IAI39                        | UPEC              | NC_011750               |
| CFT073                       | UPEC              | NC_004431               |
| S88                          | NMEC              | NC_011742               |
| APEC O1                      | APEC              | NC_008563               |
| SE11                         | Commensal         | NC_011415               |
| HS                           | Commensal         | NC_009800               |
| MG1655                       | K12               | NC_000913               |
| W                            | Lab               | NC_017635               |
| ATCC 8739                    | Lab               | NC_010468               |
| BL21(DE3)                    | Lab               | NC_012971               |
| <i>Shigella sonnei</i> Ss046 | <i>Shigella</i>   | NC_007384               |
| <i>S. dysenteriae</i> Sd197  | <i>Shigella</i>   | NC_007606               |
| <i>S. flexneri</i> 301       | <i>Shigella</i>   | NC_004337               |
| <i>S. boydii</i> 227         | <i>Shigella</i>   | NC_007613               |

<sup>a</sup>O157:H, <sup>b</sup>O104:H4, <sup>c</sup>O103:H2, <sup>d</sup>O26:H11, <sup>e</sup>O145:H28, <sup>f</sup>O111:H-

**Table S2. Virulence traits of strain STEC299**

\* C, virulence genes on chromosome; p1, genes on plasmid pSTEC299-1; p2, genes on plasmid pSTEC299-2.

| Gene        | Description                                                   | Presence/Postion* |
|-------------|---------------------------------------------------------------|-------------------|
| <i>stx</i>  | Shiga-toxin 1                                                 | Negative          |
| <i>stx2</i> | Shiga-toxin 2                                                 | Positive/C        |
| <i>eae</i>  | Intimin (adhesin)                                             | Negative          |
| <i>ehxA</i> | Enterohaemolysin A                                            | Negative          |
| <i>saa</i>  | Shiga-toxin-producing <i>E. coli</i> autoagglutinationadhesin | Negative          |
| <i>efa1</i> | Enterohaemorrhagic <i>E. coli</i> factor for adherence        | Negative          |
| <i>fuyA</i> | Yersiniabactinsiderophore (receptor)                          | Positive/C        |
| <i>chuA</i> | hemin uptake-related factor                                   | Positive/C        |
| <i>ibeA</i> | Endothelial invasion                                          | Positive/C        |
| <i>tsh</i>  | Temperature-sensitive haemagglutinin                          | Positive/C        |
| <i>fimA</i> | Type I fimbriae                                               | Positive/C        |
| <i>yfcV</i> | Fimbrial protein                                              | negative          |
| <i>paa</i>  | Adherence                                                     | p1                |
| <i>gsp</i>  | Type II secretion protein                                     | p1                |
| <i>pic</i>  | Pic involved in the intestinal colonization                   | p2                |
| <i>draC</i> | Dr family of adhesins                                         | p1                |
| <i>focC</i> | F1C fimbriae                                                  | C                 |
| <i>ecpA</i> | <i>E. coli</i> common pilus                                   | C                 |
| <i>draC</i> | Dr family of adhesins                                         | p1                |
| <i>irp1</i> | Yersiniabactin biosynthetic protein                           | C                 |
| <i>irp2</i> | Yersiniabactin biosynthetic protein                           | C                 |
| <i>entA</i> | Iron chelator                                                 | C                 |
| <i>espC</i> | Enterotoxin gene                                              | p1                |
| <i>ecpA</i> | <i>E. coli</i> common pilus                                   | C                 |



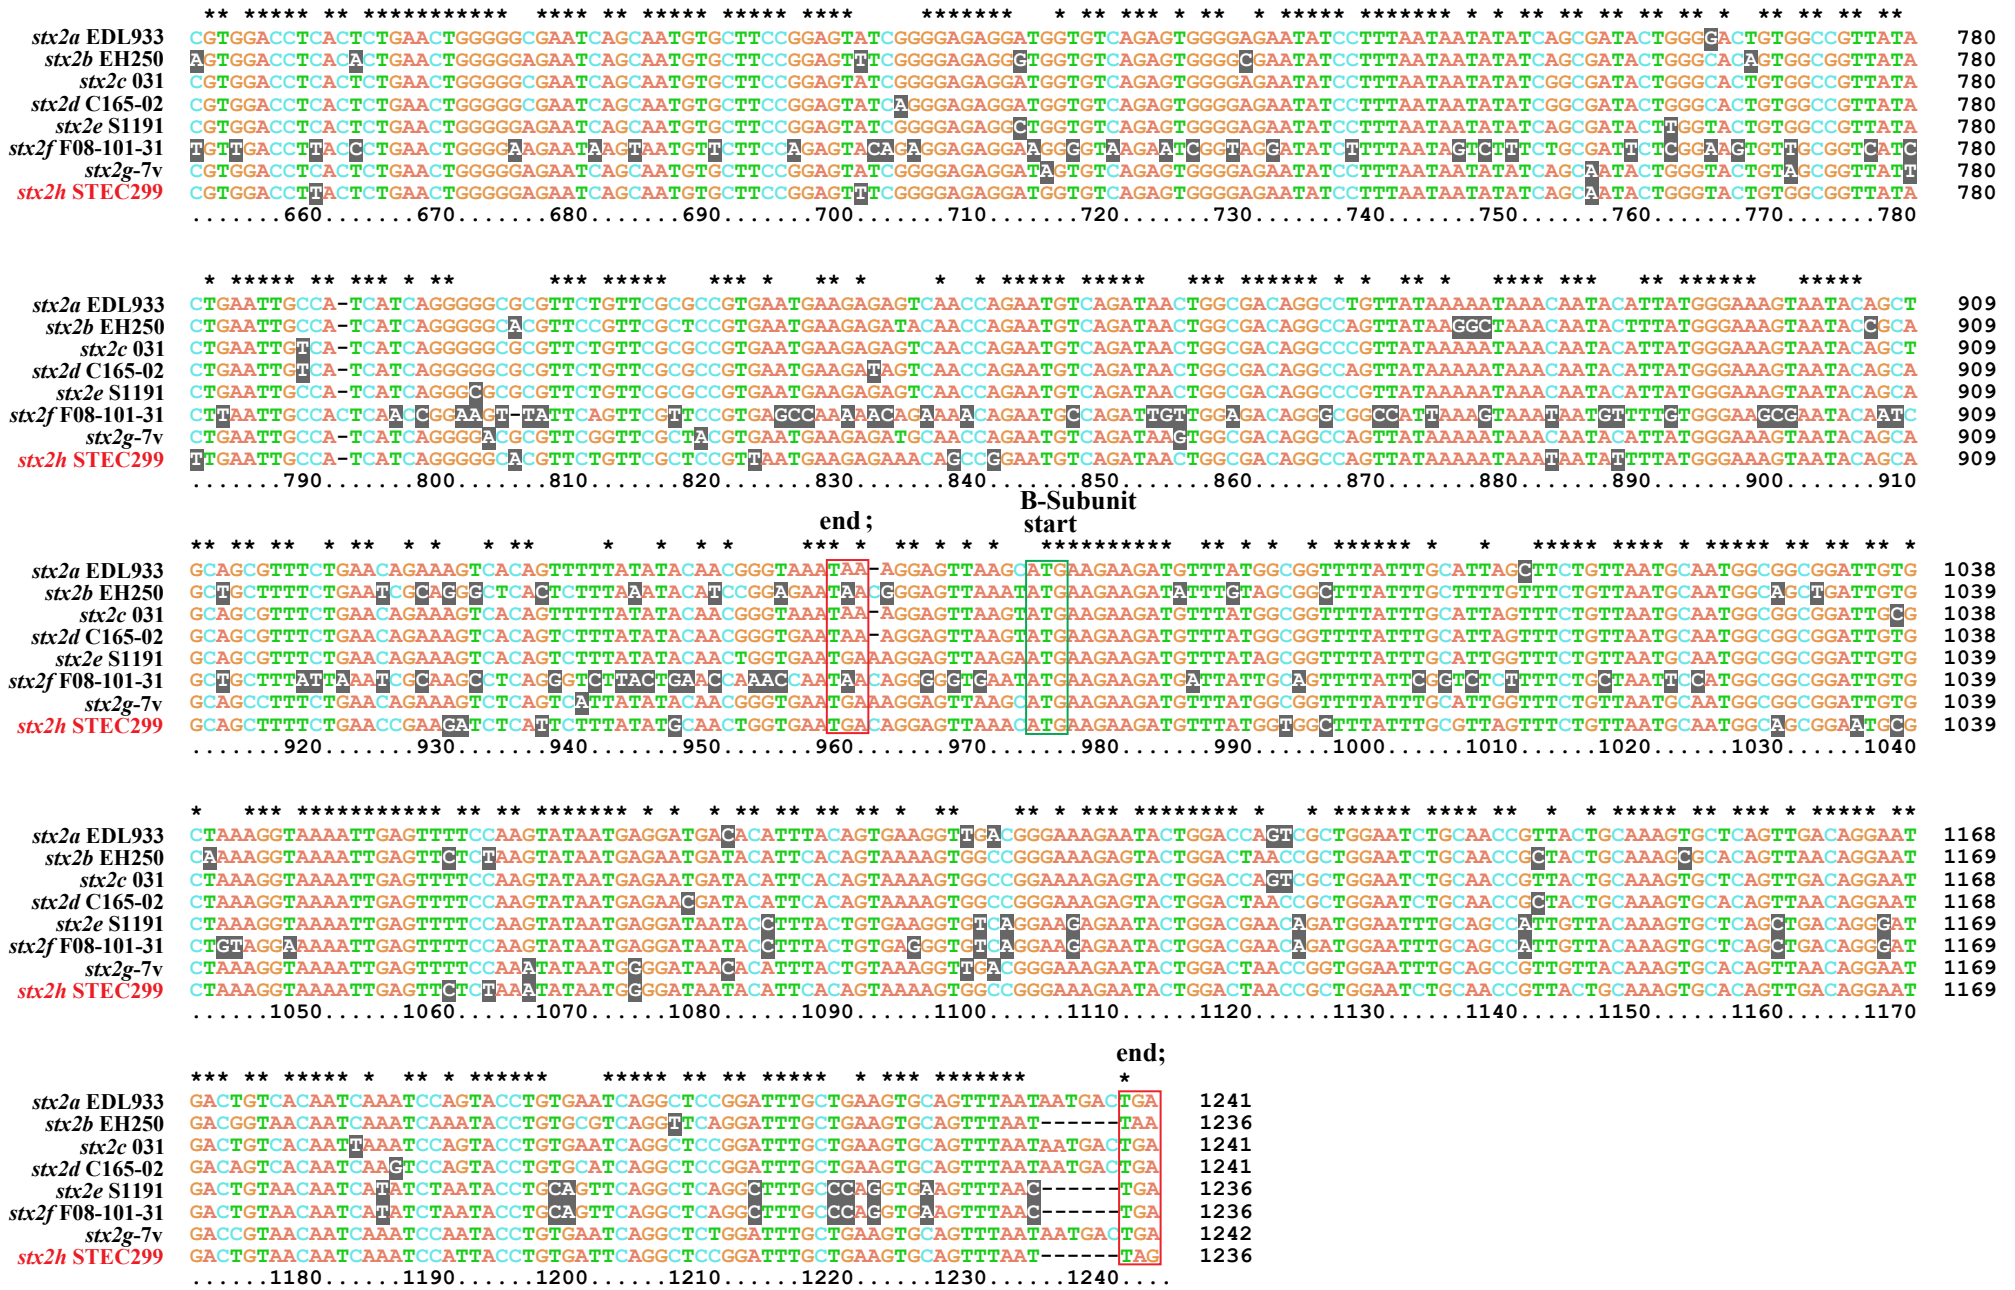

**Figure S1. Nucleotide comparison of stx2h with other stx2 subtypes.**  
Nucleotide conserved with the stx2 sequences are indicated with an asterisk. Shaded letters represent nucleotide differences between the sequences of different stx2 subtypes. Nucleotides in green and red boxes indicate start and stop codon respectively for subunit A and B.

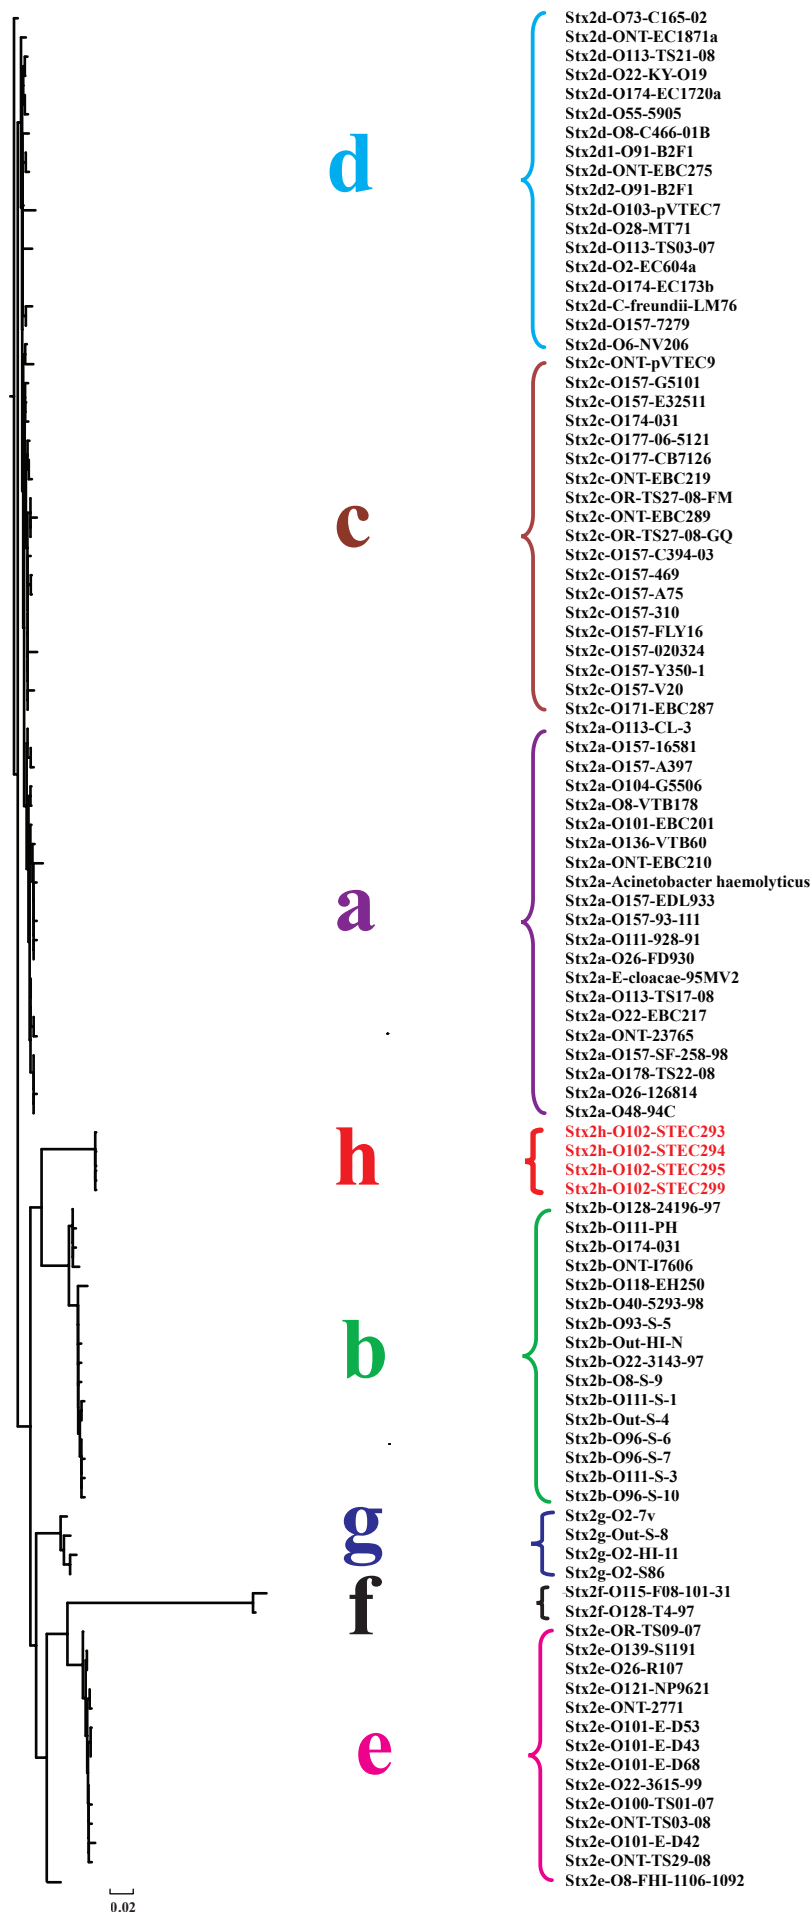

**Figure S2. Phylogenetic analysis of Stx2 subtypes and variants by the neighbor-joining method**

The neighbor-joining tree was inferred from comparison of combined A and B holotoxin amino acid sequences of Stx2h and 93 representatives of other known Stx2 subtypes and variants. Bar, 0.02 substitutions per site. Stx2 subtypes are indicated by different colors.

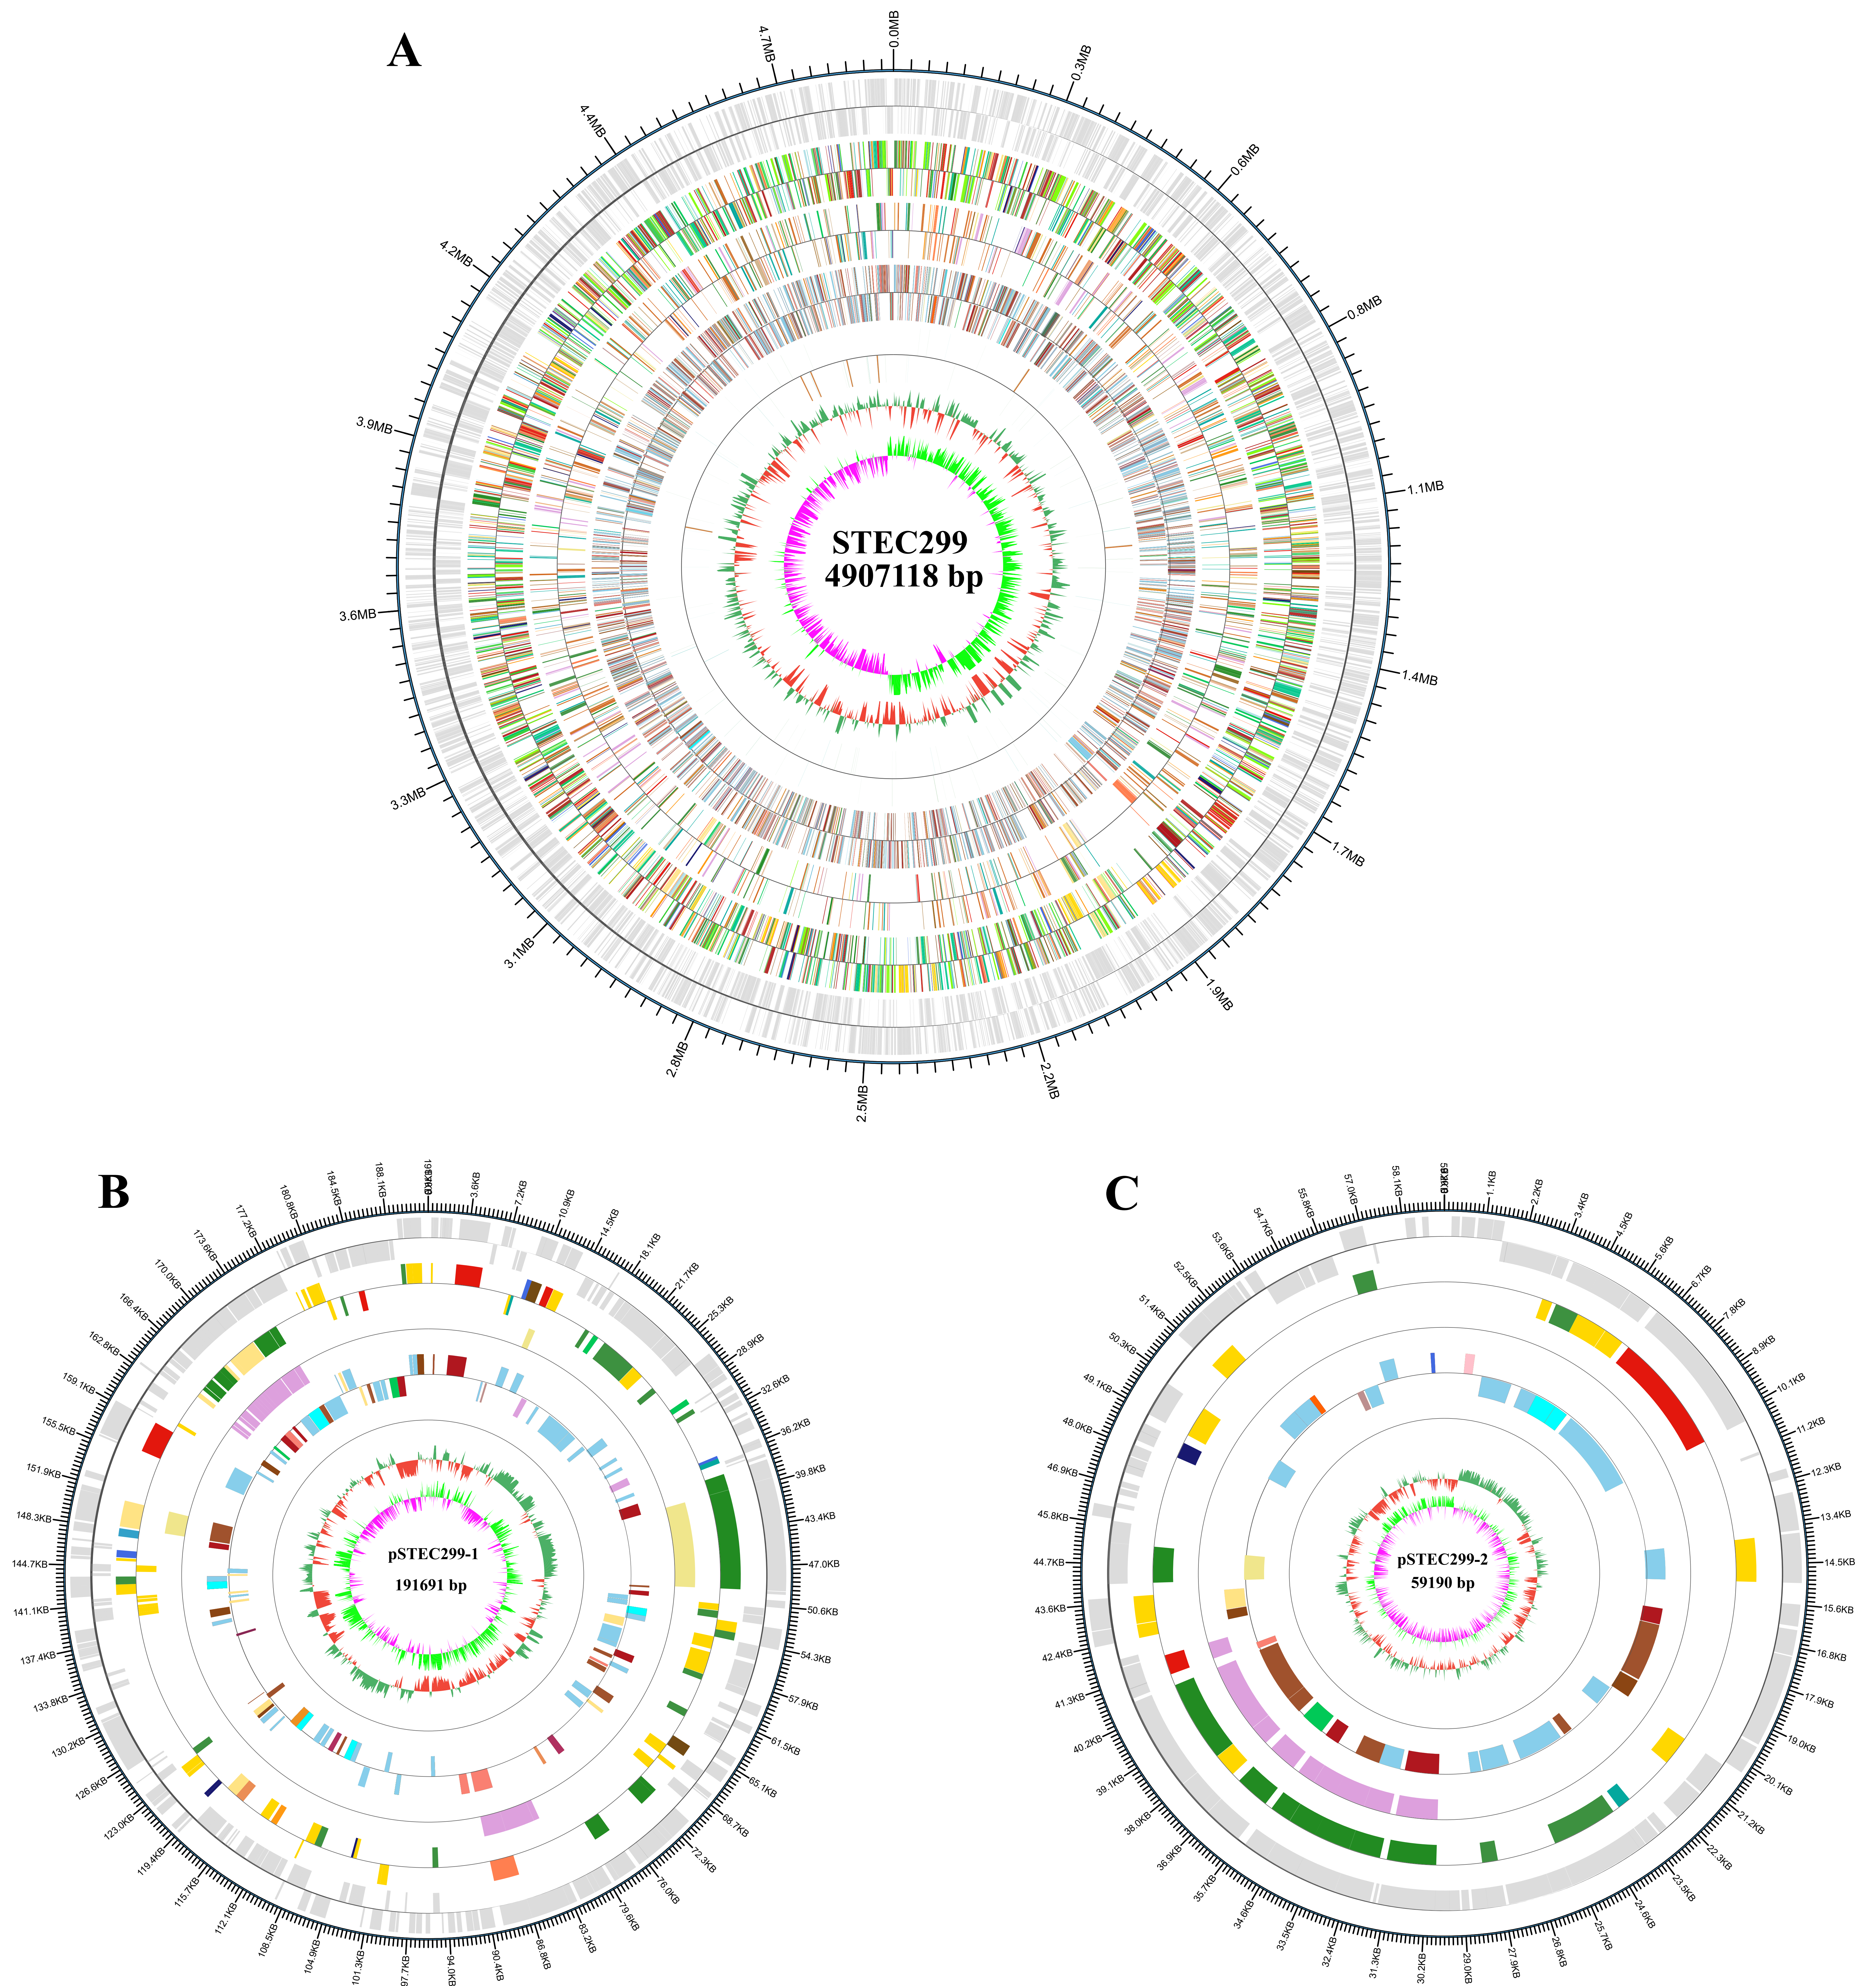

**Figure S3. Genome features of STEC299.**

Circular maps of the chromosome (A), and the two plasmids, pSTEC299-1 (B) and pSTEC299-2 (C). For both chromosome and plasmids, from outer circle to inner circle, each represents CDS (circle 1 and 2), COG annotation (circle 3 and 4), KEGG annotation (circle 5 and 6), GO annotation (circle 7 and 8), ncRNA (circle 9 and 10), GC Content (circle 11), GC Skew (circle 12). The two circles in one parentheses contains positive and negative strands respectively.
